# Supplementary material for: Factors Associated With Use of Mental Health and Substance Use Treatment Services by Justice-Involved Youths
Source: Atypon-hosted journal article supplement (doi:10.1176/appi.ps.201800322), 2019-05-29
Supplement: appi.ps.201800322.ds001.pdf [file appi.ps.201800322.ds001.pdf]

**Supplemental Table 1. Barriers to obtaining MHSU<sup>a</sup> services for FTO-CINI youth**

|                                                                                                                    | All (N=423) |      | No MHSU Services Use (N=272) |      | MHSU Services Use (N=151) |      | <i>p</i> -value |
|--------------------------------------------------------------------------------------------------------------------|-------------|------|------------------------------|------|---------------------------|------|-----------------|
|                                                                                                                    | N           | %    | N                            | %    | N                         | %    |                 |
| # of caregiver-reported barriers to youth MHSU treatment (past 4 mo)                                               |             |      |                              |      |                           |      |                 |
| 0                                                                                                                  | 336         | 79.4 | 238                          | 87.5 | 98                        | 64.9 | <.001           |
| >= 1                                                                                                               | 87          | 20.6 | 34                           | 12.5 | 53                        | 35.1 |                 |
| <b>Barrier Type</b>                                                                                                |             |      |                              |      |                           |      |                 |
| Distrust professionals (e.g. therapists or doctors)/<br>Had a previous negative experience with therapy            | 18          | 4.3  | 2                            | 0.7  | 16                        | 10.6 |                 |
| Worried that your child might be taken away from<br>your home, or worried you might lose custody of<br>your child. | 12          | 2.8  | 3                            | 1.1  | 9                         | 6.0  |                 |
| Time                                                                                                               | 18          | 4.3  | 5                            | 1.8  | 13                        | 8.6  |                 |
| Did not have enough information (e.g. not sure<br>who to call, where to find services, etc.)                       | 15          | 3.6  | 6                            | 2.2  | 9                         | 6.0  |                 |
| Language barrier                                                                                                   | 1           | 0.2  | 1                            | 0.4  | 0                         | 0.0  |                 |
| Felt embarrassed, or as if the professionals you go<br>to see might judge you                                      | 8           | 1.9  | 3                            | 1.1  | 5                         | 3.3  |                 |
| Cost                                                                                                               | 14          | 3.3  | 3                            | 1.1  | 11                        | 7.3  |                 |
| Agency/Program issues (e.g. waiting lists,<br>problems with insurance, delays because of<br>paperwork, etc.)       | 24          | 5.7  | 5                            | 1.8  | 19                        | 12.6 |                 |
| Transportation issues                                                                                              | 25          | 5.9  | 10                           | 3.7  | 15                        | 9.9  |                 |
| Childcare issues                                                                                                   | 4           | 0.9  | 1                            | 0.4  | 3                         | 2.0  |                 |
| The service your child needed was not available                                                                    | 7           | 1.7  | 2                            | 0.7  | 5                         | 3.3  |                 |
| Did not feel treatment was necessary                                                                               | 11          | 2.6  | 9                            | 3.3  | 2                         | 1.3  |                 |

<sup>a</sup>MHSU = Mental health and/or substance use treatment services, including one or more of the following: psychotropic medication, psychiatric inpatient visit, inpatient alcohol/drug treatment, day hospital or partial hospitalization, outpatient drug/alcohol treatment, mental health center, private professional help from a psychiatrist, psychologist, social worker or psychiatric nurse.
